# Supplementary material for: Baseline C-reactive protein predicts efficacy of the first-line immune checkpoint inhibitors plus chemotherapy in advanced lung squamous cell carcinoma: a retrospective, multicenter study
Source: PubMed Central journal article supplement (PMC10725584; doi:10.1186/s12885-023-11737-x), 2023-12-16
Supplement: 12885_2023_11737_MOESM1_ESM.pdf [file 12885_2023_11737_MOESM1_ESM.pdf]

## Supplementary Materials for

### **Baseline C-reactive protein predicts efficacy of the first-line immune checkpoint inhibitors plus chemotherapy in advanced lung squamous cell carcinoma: a retrospective, multicenter study**

**This PDF file includes:**

Table S1 to S5

Fig. S1 to S3

**Table S1.** Reference Values for C-reactive protein (CRP) Across Different Hospital Centers

| <b>Center</b>                                                  | <b>Reference Value for CRP (mg/L)</b> |
|----------------------------------------------------------------|---------------------------------------|
| Fujian Cancer Hospital                                         | <10                                   |
| Sir Run Run Shaw Hospital                                      | <6                                    |
| Tongji Hospital                                                | 0-8                                   |
| Shengjing Hospital of China Medical University                 | 0-6                                   |
| Cancer Hospital Chinese Academy of Medical Sciences            | 0-6                                   |
| Zhongshan Hospital Xiamen University                           | 0-6                                   |
| Fujian Provincial Hospital                                     | 0-8                                   |
| The first affiliated Hospital, Zhejiang University             | 0-8                                   |
| Peking University Cancer Hospital                              | <8                                    |
| Fujian Medical University Union Hospital                       | 0-8                                   |
| West China Hospital, Sichuan University                        | <5                                    |
| Sichuan Cancer Hospital                                        | <5                                    |
| Henan Cancer Hospital                                          | 0-6                                   |
| Hunan Cancer Hospital                                          | <6                                    |
| Quanzhou First Hospital                                        | 0-8                                   |
| Nanfang Hospital                                               | 0-6                                   |
| Xijing Hospital                                                | 0-6                                   |
| The Second Affiliated Hospital of Chongqing Medical University | 0-10                                  |
| Zhejiang Cancer Hospital                                       | 0-10                                  |
| Xinqiao Hospital, Army Medical University                      | 0-8                                   |
| The Second Affiliated Hospital of Nanchang University          | 0-8                                   |
| Jiangsu Province Hospital                                      | 0-6                                   |
| The First affiliated Hospital of Xiamen University             | 0-10                                  |
| The Second Xiangya Hospital of Central South University        | 0-6                                   |
| Nanping First Hospital                                         | 0-10                                  |

**Table S2.** Tumor Response Rates in Chemotherapy Plus ICI Group versus Chemotherapy Group

|                             | <b>All patients<br/>(n=245)</b> | <b>Chemotherapy plus ICI<br/>(n=105)</b> | <b>Chemotherapy alone<br/>(n=140)</b> | <b>OR</b> | <b>95% CI</b> | <b>P</b> |
|-----------------------------|---------------------------------|------------------------------------------|---------------------------------------|-----------|---------------|----------|
| Objective Response Rate (%) | 122 (50)                        | 62 (59)                                  | 60 (43)                               | 0.52      | 0.31–0.87     | 0.012    |

Abbreviations: ICI, immune checkpoint inhibitor; OR, odds ratio; CI, confidence interval; n, number of patients.

**Table S3.** Hazard ratios for progression-free survival according to quintile of C-reactive protein in patients

| <b>Chemotherapy plus ICI</b> |                        |                      |                              | <b>Multivariate Analysis <sup>a</sup></b> |               |                       |
|------------------------------|------------------------|----------------------|------------------------------|-------------------------------------------|---------------|-----------------------|
| <b>Quintile of CRP Level</b> | <b>No. of Patients</b> | <b>Median (mg/L)</b> | <b>Quintile Value (mg/L)</b> | <b>HR</b>                                 | <b>95% CI</b> | <b>Trend <i>P</i></b> |
| 1(ref)                       | 28                     | 1.96                 | < 3.98                       | 1.00                                      |               | <b>0.039</b>          |
| 2                            | 18                     | 6.40                 | 3.98–10.36                   | 1.77                                      | 0.76–4.14     |                       |
| 3                            | 17                     | 15.30                | 10.36–26.25                  | 3.21                                      | 1.37–7.74     |                       |
| 4                            | 18                     | 37.79                | 26.25–54.74                  | 4.50                                      | 1.85–10.95    |                       |
| 5                            | 24                     | 91.97                | ≥54.74                       | 2.02                                      | 0.77–5.37     |                       |

  

| <b>Chemotherapy alone</b>    |                        |                      |                              | <b>Multivariate Analysis</b> |               |                       |
|------------------------------|------------------------|----------------------|------------------------------|------------------------------|---------------|-----------------------|
| <b>Quintile of CRP Level</b> | <b>No. of Patients</b> | <b>Median (mg/L)</b> | <b>Quintile Value (mg/L)</b> | <b>HR</b>                    | <b>95% CI</b> | <b>Trend <i>P</i></b> |
| 1(ref)                       | 21                     | 2.40                 | < 3.98                       | 1.00                         |               | 0.113                 |
| 2                            | 31                     | 7.15                 | 3.98–10.36                   | 3.12                         | 1.45–6.7      |                       |
| 3                            | 32                     | 15.60                | 10.36–26.25                  | 2.36                         | 1.25–4.43     |                       |
| 4                            | 31                     | 38.00                | 26.25–54.74                  | 2.48                         | 1.29–4.76     |                       |
| 5                            | 25                     | 84.80                | ≥54.74                       | 1.53                         | 0.79–2.95     |                       |

Abbreviations: CRP, C-reactive protein; HR, hazard ratio; CI, confidence interval; PFS, progression-free survival; ICI, immune checkpoint inhibitor.

<sup>a</sup> Adjusted for age, sex, smoking, PD-L1, LDH, NLR, ECOG score, brain metastases, liver metastases, and bone metastases in multivariable analysis.



**Table S4.** Multivariate logistic regression analysis of objective response rate in patients treated with combination chemotherapy and immunotherapy

| Characteristics                         | OR   | 95% CI    | <i>P</i>     |
|-----------------------------------------|------|-----------|--------------|
| CRP (Elevated vs. Normal)               | 3.27 | 1.23–8.71 | <b>0.018</b> |
| Age ( $\geq 65$ vs. $< 65$ years)       | 1.97 | 0.82–4.75 | 0.132        |
| Sex (Male vs. Female)                   | 0.84 | 0.15–4.81 | 0.841        |
| Smoke (Current/Former vs. Never)        | 0.85 | 0.16–4.54 | 0.853        |
| ECOG score (1 vs. 0)                    | 0.51 | 0.13–1.93 | 0.323        |
| LDH (Elevated vs. Normal)               | 1.01 | 0.38–2.65 | 0.991        |
| NLR ( $\geq 3$ vs. $< 3$ )              | 0.56 | 0.21–1.47 | 0.240        |
| PD-L1 (1–49 vs. $< 1\%$ )               | 0.69 | 0.17–2.83 | 0.633        |
| PD-L1 ( $\geq 50$ vs. $< 1\%$ )         | 1.45 | 0.31–6.70 | 0.612        |
| Brain metastases (Presence vs. Absence) | 0.70 | 0.15–3.26 | 0.652        |
| Liver metastases (Presence vs. Absence) | 1.59 | 0.52–4.91 | 0.427        |
| Bone metastases (Presence vs. Absence)  | 0.94 | 0.38–2.35 | 0.901        |

Abbreviations: CRP, C-reactive protein; NLR, neutrophil to lymphocyte ratio; LDH, lactate dehydrogenase; ECOG, Eastern Cooperative Oncology Group; OR, Odds Ratio; CI, Confidence Interval; ICI, immune checkpoint inhibitor; n, number of patients.

**Table S5.** Multivariable analysis of factors influencing overall survival in patients treated with combination chemotherapy and immunotherapy versus chemotherapy alone

| Characteristics                         | Chemotherapy plus ICI |             |              | Chemotherapy alone |            |          |
|-----------------------------------------|-----------------------|-------------|--------------|--------------------|------------|----------|
|                                         | HR                    | 95% CI      | <i>P</i>     | HR                 | 95% CI     | <i>P</i> |
| CRP (Elevated vs. Normal)               | 2.98                  | 1.27 – 7.00 | <b>0.012</b> | 1.50               | 0.74–3.03  | 0.265    |
| Age (≥65 vs. <65 years)                 | 1.39                  | 0.64 - 3.03 | 0.406        | 0.85               | 0.29–2.50  | 0.762    |
| Sex (Male vs. Female)                   | Inf <sup>a</sup>      |             |              | 1.49               | 0.84–2.65  | 0.173    |
| Smoke (Current/Former vs. Never)        | Inf                   |             |              | 4.10               | 0.87–19.31 | 0.074    |
| ECOG score (1 vs. 0)                    | 0.82                  | 0.28 - 2.39 | 0.719        | 1.07               | 0.43–2.65  | 0.885    |
| LDH (Elevated vs. Normal)               | 2.13                  | 0.92 - 4.89 | 0.075        | 1.13               | 0.65–1.97  | 0.665    |
| NLR (≥3 vs. <3)                         | 0.79                  | 0.33 - 1.92 | 0.603        | 1.61               | 0.72–3.60  | 0.244    |
| PD–L1 (1–49 vs. <1%)                    | 1.10                  | 0.27 - 4.40 | 0.897        | 1.05               | 0.09–12.47 | 0.961    |
| PD–L1 (≥50 vs. <1%)                     | 0.56                  | 0.14 - 2.25 | 0.409        | 2.50               | 0.44–14.15 | 0.305    |
| Brain metastases (Presence vs. Absence) | 0.70                  | 0.14 - 3.58 | 0.668        | 1.70               | 0.79–3.67  | 0.173    |
| Liver metastases (Presence vs. Absence) | 1.17                  | 0.4 - 3.40  | 0.773        | 0.71               | 0.34–1.47  | 0.355    |
| Bone metastases (Presence vs. Absence)  | 1.74                  | 0.8 - 3.75  | 0.159        | 1.36               | 0.73–2.54  | 0.336    |

<sup>a</sup> The appearance of "Inf" for certain variables may indicate a lack of maturity in overall survival data or imbalances in subgroup sample sizes, leading to instability in the estimation.

Abbreviations: CRP, C–reactive protein; NLR, neutrophil to lymphocyte ratio; LDH, lactate dehydrogenase; ECOG, Eastern Cooperative Oncology Group; HR, Hazard Ratio; CI, Confidence Interval; ICI, immune checkpoint inhibitor; n, number of patients.

**Fig.S1.** Kaplan–Meier estimates for progression-free survival according to treatment modality

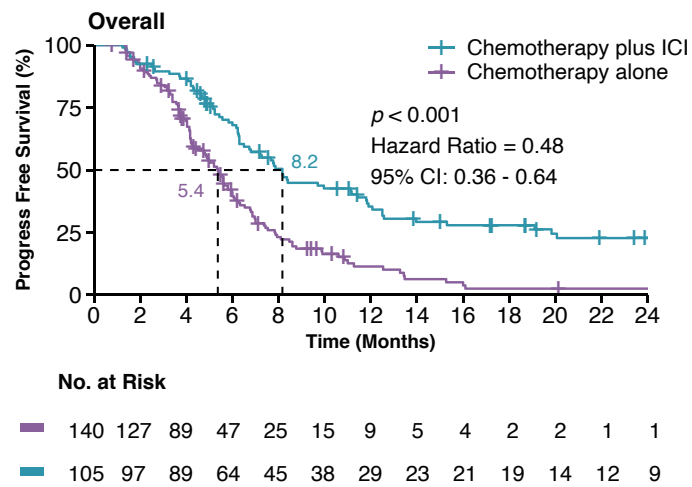

The '+' symbols represent censored data points, indicating times at which patients were lost to follow-up without experiencing the event of interest. The log-rank test was used to compare the survival distributions, and the difference was found to be statistically significant ( $p < 0.05$ ).



**Fig. S2.** Comparing the Predictive Accuracy of C-Reactive Protein and Bone Metastasis for Progression-Free Survival

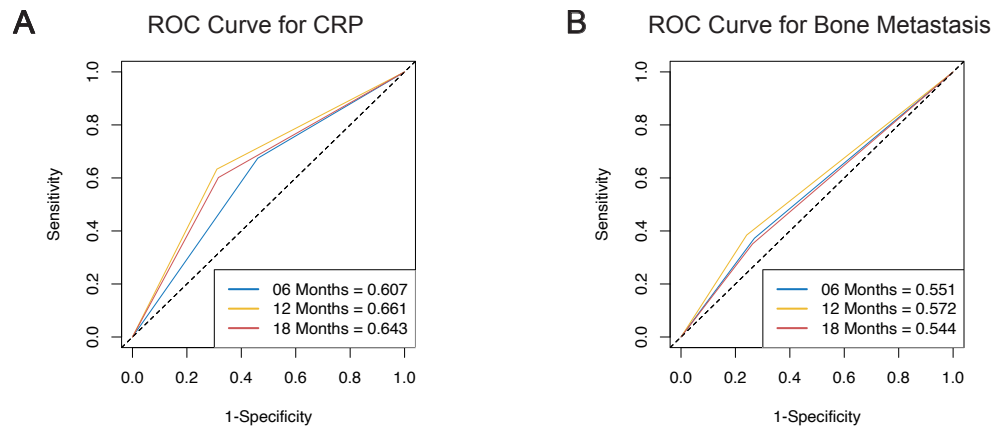

**(A)** and **(B)** depict the ROC curves for the prediction of Progression-Free Survival (PFS) using C-Reactive Protein (CRP) and bone metastasis, respectively. In each graph, the x-axis represents the False Positive Rate, while the y-axis represents the True Positive Rate. The Area Under the Curve (AUC), indicated next to each curve, represents the predictive performance for disease progression at 6 months, 12 months, and 18 months.

**Fig. S3.** Restricted Cubic Spline of the Association Between C-reactive Protein and the Disease Progression Hazard Ratio

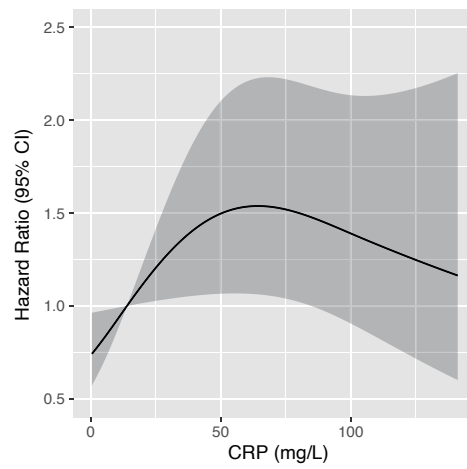

The curve is modeled using restricted cubic spline function with 3 knots.
